# Supplementary material for: A heteroepitaxial interface of Pt//CeO2 nanoparticles for enhanced catalysis of the oxygen reduction reaction (ORR)
Source: Royal Society of Chemistry journal article supplement (doi:10.1039/d4ta07380k), 2025-01-01
Supplement: d4ta07380k1.pdf [file d4ta07380k1.pdf]

## SUPPORTING INFORMATIONS

### **Heteroepitaxial Interface of Pt//CeO<sub>2</sub> Nanoparticles for Enhanced Catalysis in Oxygen Reduction Reaction (ORR)**

Nasrat Hannah Shudin, <sup>a, b</sup> Ryuto Eguchi <sup>a, c</sup>, Shigenori Ueda <sup>a</sup>, Ankit Singh <sup>a</sup>, Ayako Hashimoto <sup>\*a, c</sup> and Hideki Abe <sup>\*a, b</sup>

*a. National Institute for Materials Science, Namiki 1-1, Tsukuba, Ibaraki 305- 0044, Japan*

*b. Graduate School of Science and Engineering, Saitama University, 255 Shimo- Okubo, Saitama 338-8570, Japan*

*c. University of Tsukuba, 1-1-1Tennodai, Tsukuba, Ibaraki 305-8577, Japan*

## Materials Characterization

### Inductively Coupled Plasma-Atomic Emission Spectroscopy (ICP-AES)

The Pt and Ce content was quantified by Inductively Coupled Plasma-Atomic Emission Spectroscopy (ICP-AES, Agilent5800, Agilent Technologies). 1.7 mg of sample was weighed and transferred to a quartz beaker. 5 mL H<sub>2</sub>SO<sub>4</sub> and a few drops of HNO<sub>3</sub> were added to the beaker and the beaker was heated until bubbling stopped. 3 mL of HCl then added to the beaker to dissolve the residues by heating. After cooling, the obtained solution was transferred to a 100 mL volumetric flask. 10 mL of 20 mg/L Mn standard solution which is used as internal standard element for ICP-AES was added to the flask and then the solution was diluted to the marked line with Milli-Q water (pure water).

Table S1. Composition of Pt and Ce obtained from ICP-AES showed a Pt: Ce molar ratio of 2:1. This value indicates an excess of Ce compared to the expected Pt:Ce ratio of 5:1 for Pt<sub>5</sub>Ce nanocrystals suggesting the sample contains not only Pt<sub>5</sub>Ce nanocrystals but also Ce-rich impurity phases.

|               | <b>Pt</b> | <b>Ce</b> |
|---------------|-----------|-----------|
| <b>Mass %</b> | 9.7       | 3.49      |
| <b>mole</b>   | 2         | 1         |

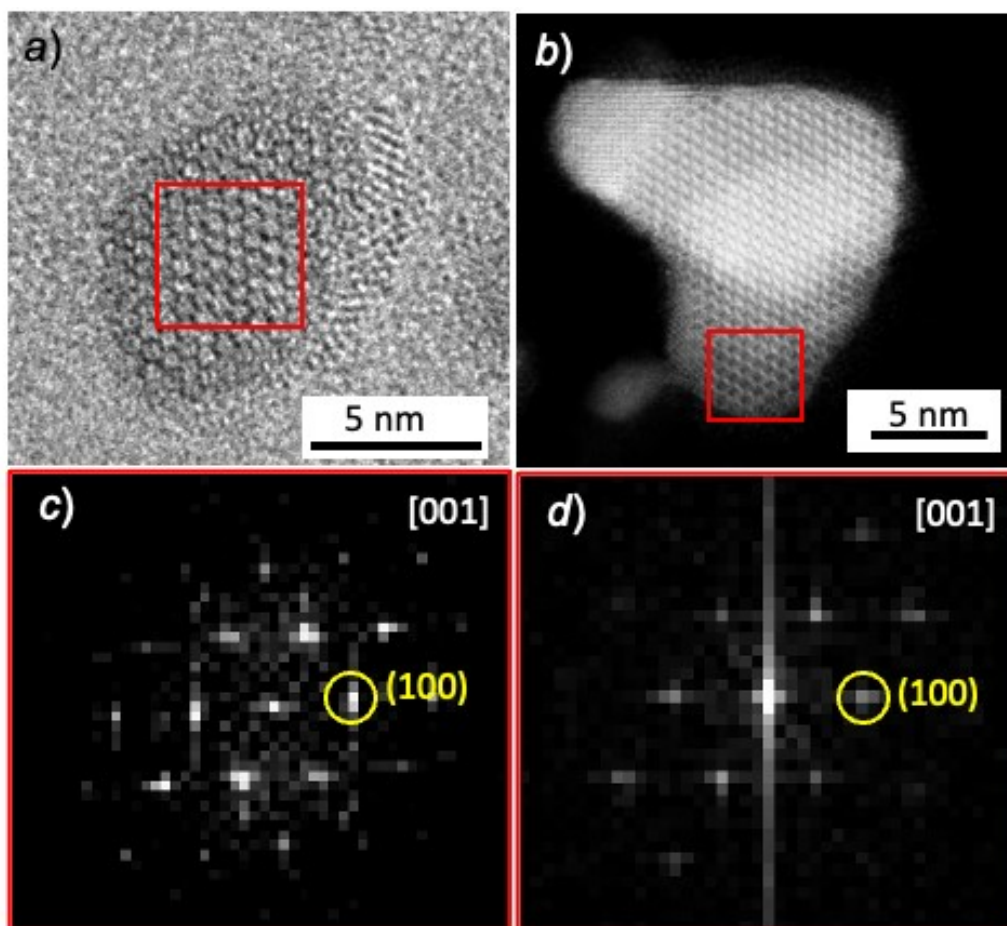

Fig. S1. *a)* TEM image and *b)* HAADF-STEM image of Pt<sub>5</sub>Ce nanocrystals, *c-d)* FFT patterns from the red squares corresponding to particles in Fig. S1*a-b*. Measurement of the interplanar spacing (0.47 nm) confirmed the successful synthesis of Pt<sub>5</sub>Ce nanocrystals.

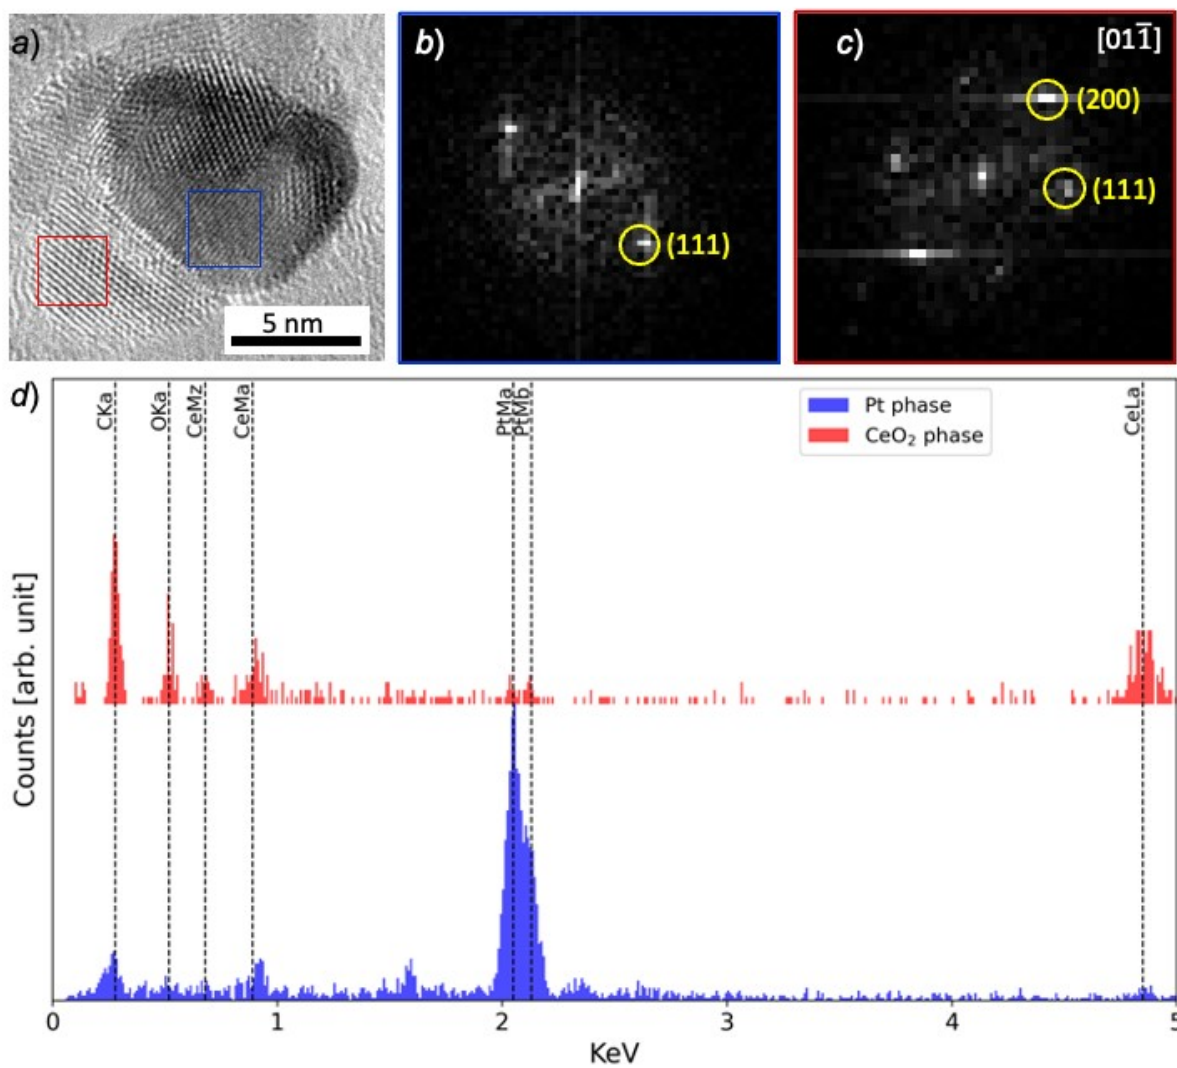

Fig. S2. *a)* TEM image of Pt//CeO<sub>2</sub> nanoparticles after phase separation, *b-c)* FFT patterns for the blue and red squares, indicating that they correspond to Pt and CeO<sub>2</sub>, respectively. *d)* EDS-spectra showing that the region at the blue square (lower) consist of Pt mainly and the region around the red one (upper) contains larger amount of oxygen and Ce relatively to Pt, confirming phase separation has indeed completed.

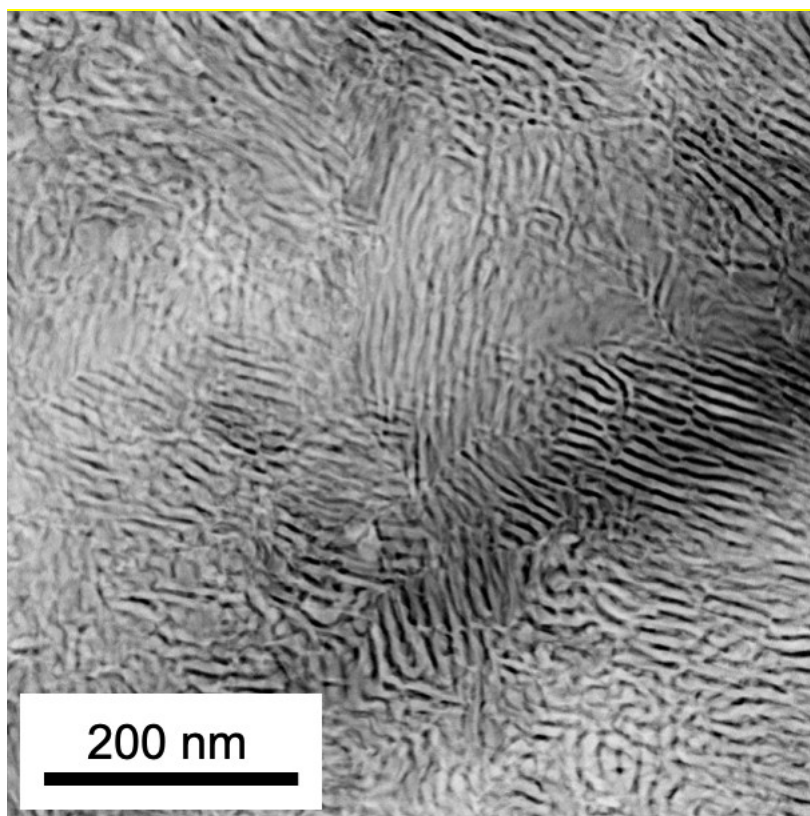

Fig. S3. Cross-section HAADF-STEM image of a phase-separated Pt//CeO<sub>2</sub> bulk particle (particle size  $\sim 50 \mu\text{m}$ ). The dark- and bright contrasted stripes correspond to the CeO<sub>2</sub>- and Pt phases, respectively. The Pt- and CeO<sub>2</sub> phases are grafted to form a heteroepitaxial Pt(111)//CeO<sub>2</sub>(111) interface, as reported in ref.19. The Pt//CeO<sub>2</sub> material was prepared by heating mechanically-powdered Pt<sub>5</sub>Ce alloy ingot in a stream of mixture gas consisting of CO (10 ml/min) and O<sub>2</sub> (5 ml/min) at 600 °C for 12 hours.

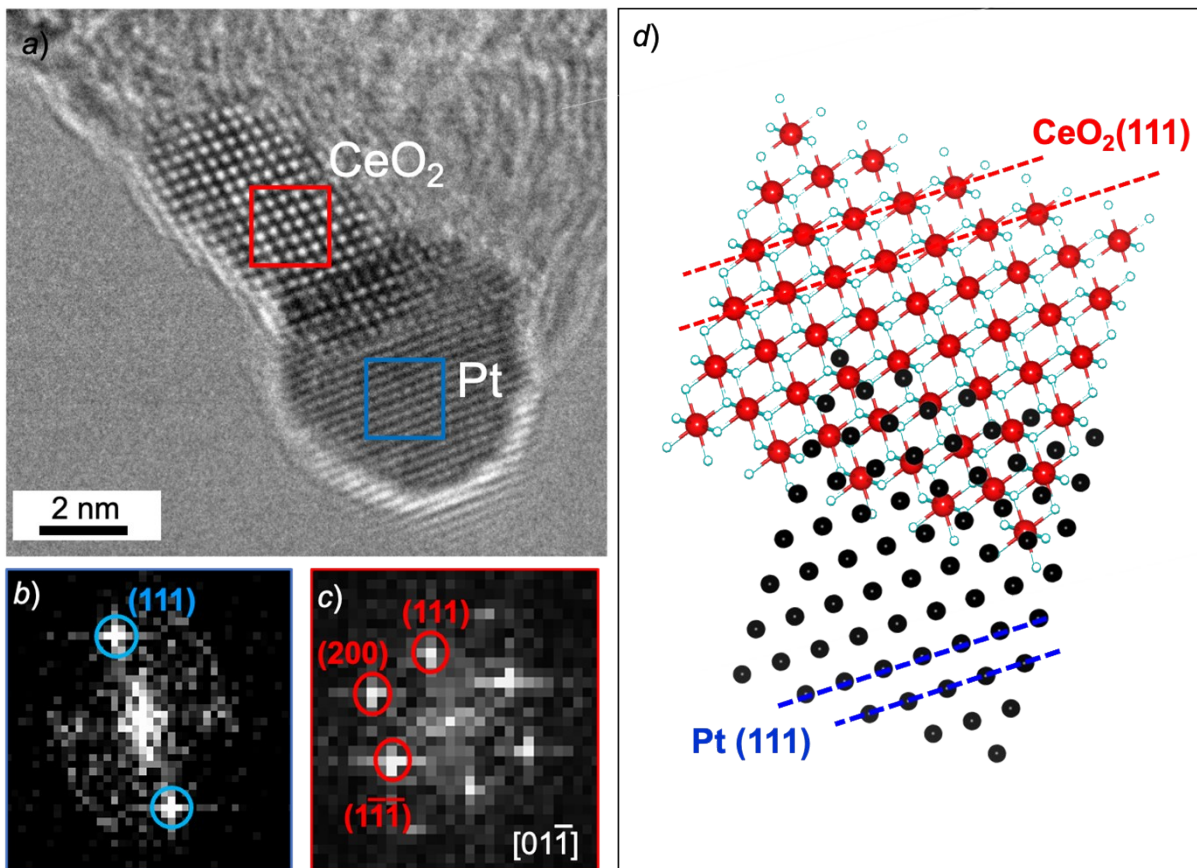

Fig. S4. *a)* TEM image of a Pt//CeO<sub>2</sub> nanoparticle with an epitaxial interface. *b-c)* FFT patterns show the epitaxial interface of Pt (111)//CeO<sub>2</sub>(111) *d)* Schematic illustrating of Pt (111)//CeO<sub>2</sub> (111) interface relationships.

## ECSA evaluation

The electrochemical surface area (ECSA) is calculated based on the formula where:

$$\text{ECSA} = \frac{Q_H}{0.21 \times [\text{Pt}]}$$

$Q_H$  is the hydrogen desorption charge from CV,  $0.21 \text{ mC cm}^{-2}$  is electrical charge associated with hydrogen desorption on Pt surface and  $[\text{Pt}]$  is loading weight of Pt on electrode. The Pt//CeO<sub>2</sub> nanoparticles had ECSA of  $9.0 \text{ cm}^2 \text{ gPt}^{-1}$  compared to the Pt//CeO<sub>2</sub> bulk catalyst,  $29 \text{ cm}^2 \text{ gPt}^{-1}$ .

To convert the potentials obtained with the Ag/AgCl electrode to the RHE (Reversible Hydrogen Electrode) scale, we employed the following equation:

$$E_{\text{RHE}} = E_{\text{Ag/AgCl}} + E^{\circ}_{\text{Ag/AgCl}} + 0.059 \times \text{pH}.$$

Here,  $E_{\text{RHE}}$  is the potential on the RHE scale,  $E_{\text{Ag/AgCl}}$  is the potential measured against the Ag/AgCl electrode,  $E^{\circ}_{\text{Ag/AgCl}}$  is the standard potential of the Ag/AgCl electrode, and  $+0.059 \text{ V}$  is the Nernstian shift per  $\text{pH}$  unit at room temperature ( $25^{\circ}\text{C}$ ). The  $\text{pH}$  of the  $0.1 \text{ M KOH}$  electrolyte solution was 13.

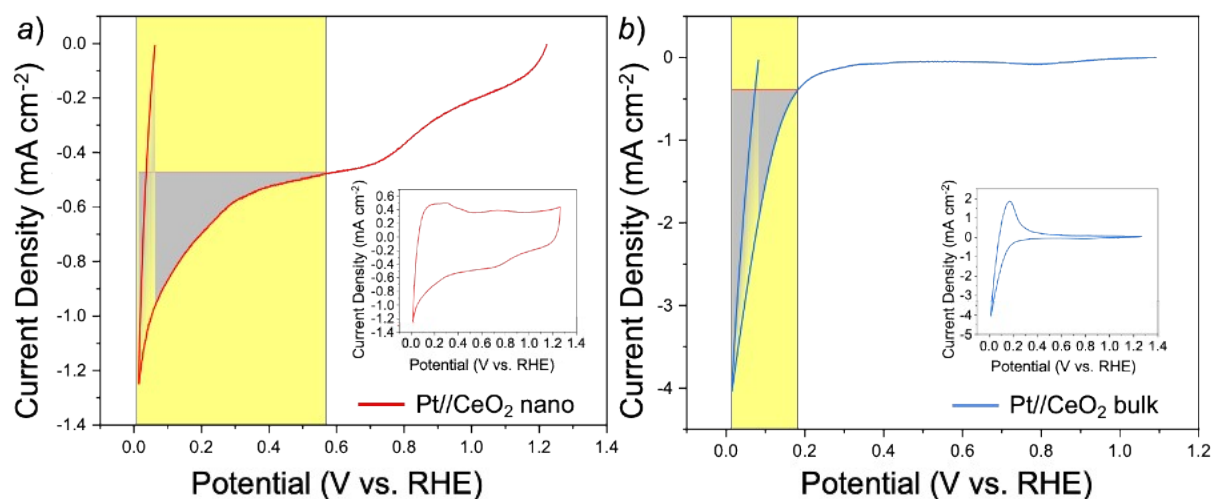

Fig. S5. ECSA calculated from integration of hydrogen desorption peak in the CV curves of a) the Pt//CeO<sub>2</sub> nanoparticles and b) the Pt//CeO<sub>2</sub> bulk catalyst. CVs were taken in  $0.1 \text{ M KOH}$  with a scan rate at  $20 \text{ mV/s}$ . The potential was referenced against an Ag/AgCl electrode and then converted to the values for the reversible hydrogen electrode (RHE) for better readability.

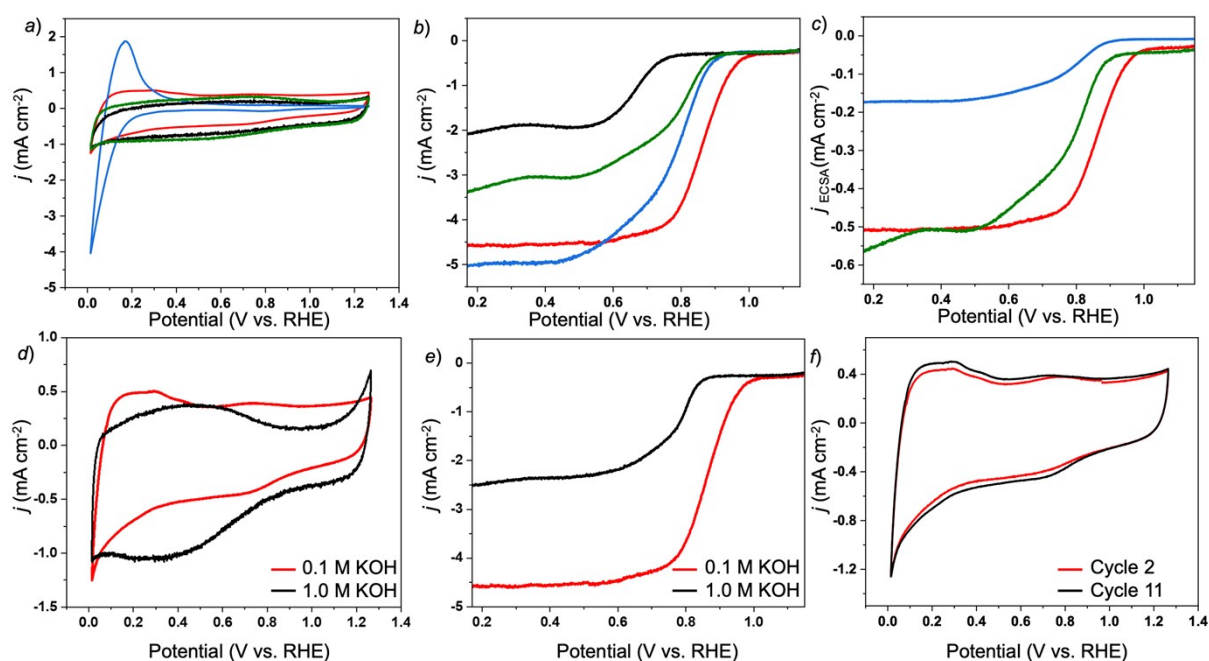

Fig. S6. *a*) Cyclic Voltammetry (CV) in Ar-saturated 0.1 M KOH, *b*) Linear sweep voltammetry (LSV), *c*) LSV normalized ESCA showing comparison of electrochemical performance of Pt<sub>5</sub>Ce nanocrystals, Pt//CeO<sub>2</sub> nanoparticles, Pt//CeO<sub>2</sub> bulk particles and graphene nanoplatelets (represents by green, red, blue and black curves). *d*) CV in Ar-saturated, *e*) LSV of Pt//CeO<sub>2</sub> nanoparticles in different pH conditions of 0.1 M KOH and 1.0 M KOH and *f*) Stability test of Pt//CeO<sub>2</sub> nanoparticles in 0.1 M KOH.

Table S2. Summary of electrochemical parameters.

| Catalysts                                      | $E_{\text{onset}}$ (V vs. RHE) | Ref.      |
|------------------------------------------------|--------------------------------|-----------|
| Pt-CeO <sub>2</sub> @CN                        | 0.954                          | 23        |
| Pt(110)//CeO <sub>2</sub> (110) nanoparticles  | 1.01                           | This work |
| Pt(111)//CeO <sub>2</sub> (111) bulk particles | 0.91                           | This work |



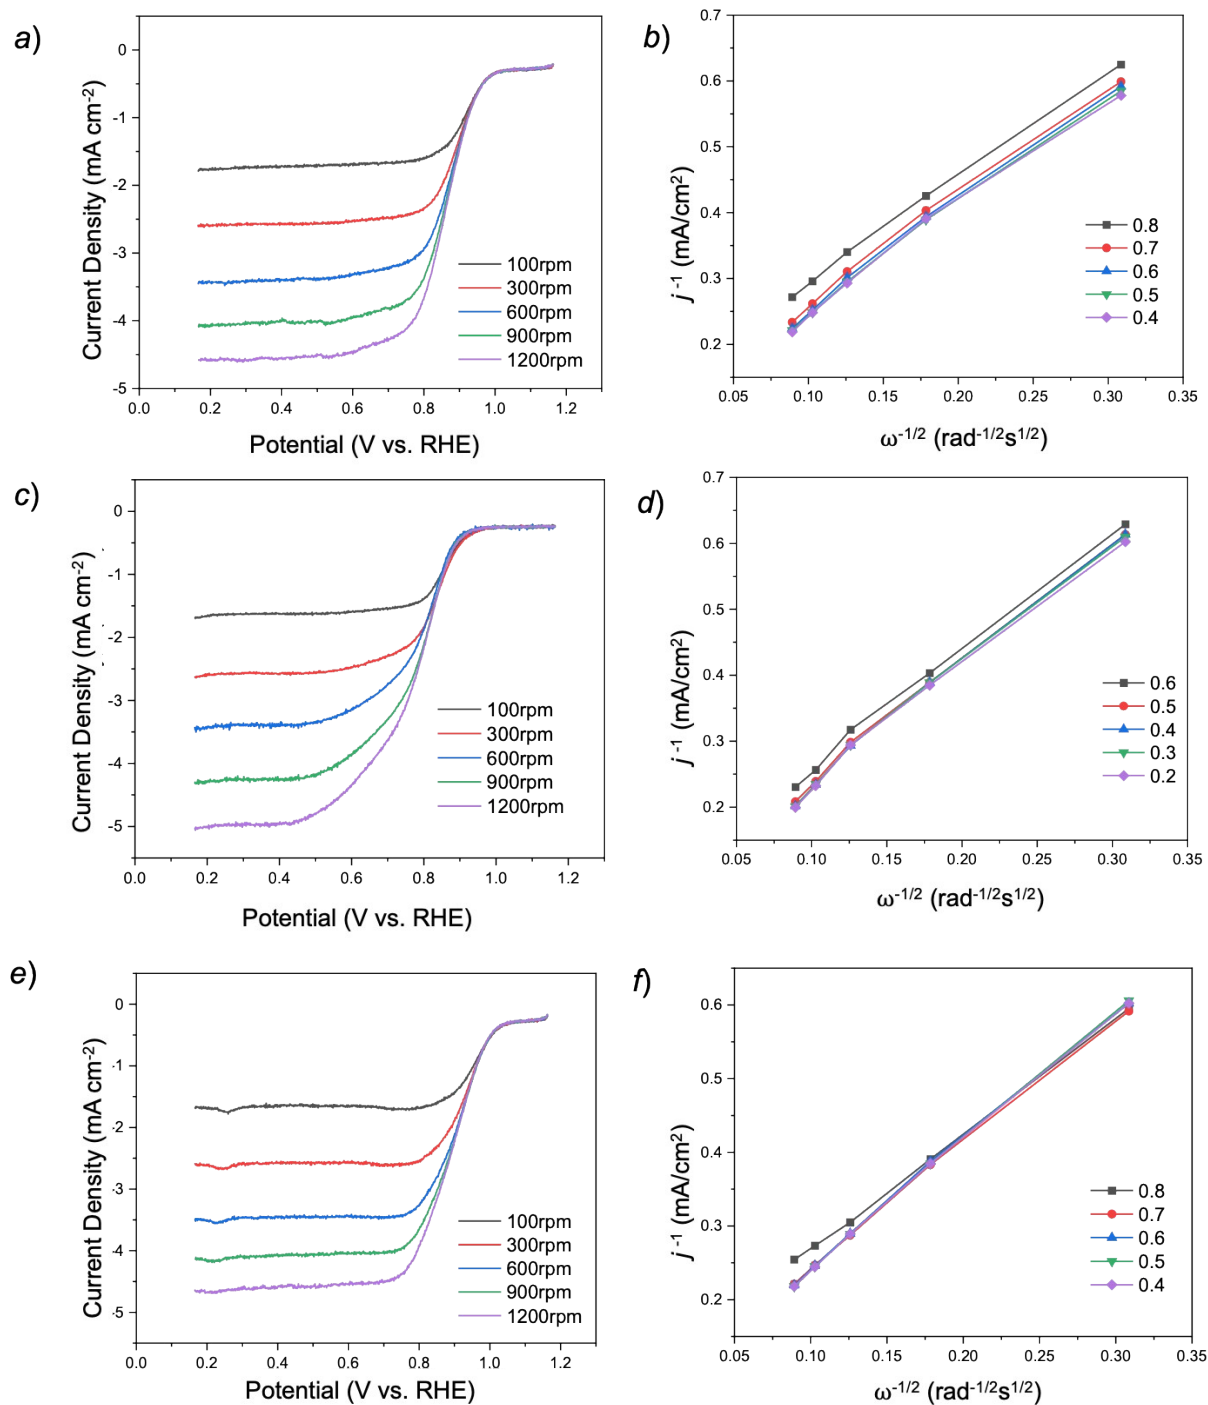

Fig. S7. The rotation-rate-dependent current-potential curves and Koutecky-Levich (K-L) plots at different potentials for (a-b) the Pt//CeO<sub>2</sub> nanoparticles, (c-d) the Pt//CeO<sub>2</sub> bulk catalyst, and (e-f) Pt/C (Fuel Cell Store, Inc., Pt loading weight=20 %). The potential was referenced against an Ag/AgCl electrode and then converted to the values for the reversible hydrogen electrode (RHE) for better readability.

The electron transfer number ( $n$ ) was obtained from the Koutechy-Levich (K-L) equations:

$$\frac{1}{j} = \frac{1}{j_L} + \frac{1}{j_K} = \frac{1}{B\omega^{1/2}} + \frac{1}{j_K}$$

$$B = 0.62nFC_oD_o^{2/3}\nu^{-1/6}$$

Where  $F$  is the Faraday's constant (96485 C/mol),  $C_o$  is the bulk concentration of  $O_2$ , to ( $1.2 \times 10^{-6}$  mol/cm for 0.1 M KOH),  $D_o$  is the diffusion coefficient of  $O_2$ , ( $1.9 \times 10^{-5}$  cm/s) and  $\nu$  is the kinetic viscosity of the 0.1 M KOH (0.01 cm<sup>2</sup>/s).

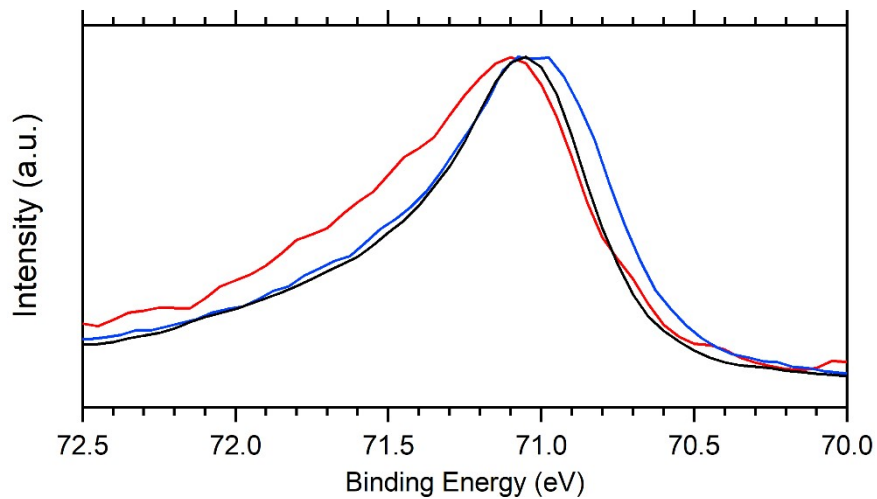

Fig. S8. HAXPES spectra of Pt  $4f_{5/2}$  region. The red, blue, and black curves correspond to the Pt//CeO<sub>2</sub> nanoparticles, the Pt//CeO<sub>2</sub> bulk catalyst, and pure Pt bulk, respectively. The Pt  $4f_{5/2}$  emission peak for the Pt//CeO<sub>2</sub> nanoparticles shows 74 meV downward shift compared to that for the Pt//CeO<sub>2</sub> bulk catalyst and pure Pt bulk.
